# Supplementary material for: Mid-old cells are a potential target for anti-aging interventions in the elderly
Source: Springer Nature journal article supplement (doi:10.1038/s41467-023-43491-w), 2023-11-22
Supplement: MOESM10 [file 41467_2023_43491_MOESM10_ESM.pdf]

## Reporting Summary

Nature Portfolio wishes to improve the reproducibility of the work that we publish. This form provides structure for consistency and transparency in reporting. For further information on Nature Portfolio policies, see our [Editorial Policies](#) and the [Editorial Policy Checklist](#).

### Statistics

For all statistical analyses, confirm that the following items are present in the figure legend, table legend, main text, or Methods section.

- | n/a                                 | Confirmed                                                                                                                                                                                                                                                                                      |
|-------------------------------------|------------------------------------------------------------------------------------------------------------------------------------------------------------------------------------------------------------------------------------------------------------------------------------------------|
| <input type="checkbox"/>            | <input checked="" type="checkbox"/> The exact sample size ( $n$ ) for each experimental group/condition, given as a discrete number and unit of measurement                                                                                                                                    |
| <input type="checkbox"/>            | <input checked="" type="checkbox"/> A statement on whether measurements were taken from distinct samples or whether the same sample was measured repeatedly                                                                                                                                    |
| <input type="checkbox"/>            | <input checked="" type="checkbox"/> The statistical test(s) used AND whether they are one- or two-sided<br><i>Only common tests should be described solely by name; describe more complex techniques in the Methods section.</i>                                                               |
| <input type="checkbox"/>            | <input checked="" type="checkbox"/> A description of all covariates tested                                                                                                                                                                                                                     |
| <input type="checkbox"/>            | <input checked="" type="checkbox"/> A description of any assumptions or corrections, such as tests of normality and adjustment for multiple comparisons                                                                                                                                        |
| <input type="checkbox"/>            | <input checked="" type="checkbox"/> A full description of the statistical parameters including central tendency (e.g. means) or other basic estimates (e.g. regression coefficient) AND variation (e.g. standard deviation) or associated estimates of uncertainty (e.g. confidence intervals) |
| <input type="checkbox"/>            | <input checked="" type="checkbox"/> For null hypothesis testing, the test statistic (e.g. $F$ , $t$ , $r$ ) with confidence intervals, effect sizes, degrees of freedom and $P$ value noted<br><i>Give <math>P</math> values as exact values whenever suitable.</i>                            |
| <input checked="" type="checkbox"/> | <input type="checkbox"/> For Bayesian analysis, information on the choice of priors and Markov chain Monte Carlo settings                                                                                                                                                                      |
| <input checked="" type="checkbox"/> | <input type="checkbox"/> For hierarchical and complex designs, identification of the appropriate level for tests and full reporting of outcomes                                                                                                                                                |
| <input checked="" type="checkbox"/> | <input type="checkbox"/> Estimates of effect sizes (e.g. Cohen's $d$ , Pearson's $r$ ), indicating how they were calculated                                                                                                                                                                    |

*Our web collection on [statistics for biologists](#) contains articles on many of the points above.*

### Software and code

Policy information about [availability of computer code](#)

Data collection

Zeiss microscope: Zen 2011 program  
Leica microscope: Leica Application Suite (LAS) software  
LeiCa Aperio Scanscope: Aperio imageScope software

Data analysis

Microsoft Excel and Prism 7 program were used for statistical analysis.  
Image processing and quantification were carried out with Zen program and DP-Manager software.  
R studio was used to process bulk RNA-sequencing and GSEA.  
MATLAB was used for cell imaging analysis.

For manuscripts utilizing custom algorithms or software that are central to the research but not yet described in published literature, software must be made available to editors and reviewers. We strongly encourage code deposition in a community repository (e.g. GitHub). See the Nature Portfolio [guidelines for submitting code & software](#) for further information.

## Data

Policy information about [availability of data](#)

All manuscripts must include a [data availability statement](#). This statement should provide the following information, where applicable:

- Accession codes, unique identifiers, or web links for publicly available datasets
- A description of any restrictions on data availability
- For clinical datasets or third party data, please ensure that the statement adheres to our [policy](#)

The data presented in this study are publicly available in NCBI's Gene expression Omnibus (GEO) and Metabolomics Workbench under the accession codes: GSE232425 [<https://www.ncbi.nlm.nih.gov/geo/query/acc.cgi?acc=GSE232425>], GSE232427 [<https://www.ncbi.nlm.nih.gov/geo/query/acc.cgi?acc=GSE232427>], GSE201457 [<https://www.ncbi.nlm.nih.gov/geo/query/acc.cgi?acc=GSE201457>], GSE41714 (cDNA microarray) [<https://www.ncbi.nlm.nih.gov/geo/query/acc.cgi?acc=GSE41714>], GSE178341 (scRNA-seq) [<https://www.ncbi.nlm.nih.gov/geo/query/acc.cgi?acc=GSE178341>], ST002960 (metabolomics) [<http://dev.metabolomicsworkbench.org:22222/data/DRCCMetadata.php?Mode=Study&StudyID=ST002960&Access=ZirF6602>], and ST002961 (lipidomics) [<http://dev.metabolomicsworkbench.org:22222/data/DRCCMetadata.php?Mode=Study&StudyID=ST002961&Access=IrhC2910>]. Source data are provided with this paper.

## Human research participants

Policy information about [studies involving human research participants and Sex and Gender in Research](#).

|                             |                                                                                                                                                                                                                                                                                                                               |
|-----------------------------|-------------------------------------------------------------------------------------------------------------------------------------------------------------------------------------------------------------------------------------------------------------------------------------------------------------------------------|
| Reporting on sex and gender | <a href="#">Patients' sex, age and diagnosis information was collected from Medical data from Ajou University Hospital.</a>                                                                                                                                                                                                   |
| Population characteristics  | <a href="#">Paraffin block of patients who got surgical resection in Ajou University Hospital from 2018 to 2020 were collected.</a>                                                                                                                                                                                           |
| Recruitment                 | <a href="#">To exclude possibility potential contamination with tumor tissue, paraffin blocks which have normal tissue 5-12 cm away from the pathologic regions were exclusively selected by pathologists. Paraffin blocks with normal tissue less than 5-12cm away from the pathologic regions were previously excluded.</a> |
| Ethics oversight            | <a href="#">Ajou University Medical Center</a>                                                                                                                                                                                                                                                                                |

Note that full information on the approval of the study protocol must also be provided in the manuscript.

## Field-specific reporting

Please select the one below that is the best fit for your research. If you are not sure, read the appropriate sections before making your selection.

- Life sciences       Behavioural & social sciences       Ecological, evolutionary & environmental sciences

For a reference copy of the document with all sections, see [nature.com/documents/nr-reporting-summary-flat.pdf](https://www.nature.com/documents/nr-reporting-summary-flat.pdf)

## Life sciences study design

All studies must disclose on these points even when the disclosure is negative.

|                 |                                                                                                                                                                              |
|-----------------|------------------------------------------------------------------------------------------------------------------------------------------------------------------------------|
| Sample size     | <a href="#">Sample size were not predetermine but counting for cell number and positive signal cell number were performed three independent replicate experiments</a>        |
| Data exclusions | <a href="#">N/A</a>                                                                                                                                                          |
| Replication     | <a href="#">All data were analyzed in three independent experiments</a>                                                                                                      |
| Randomization   | <a href="#">For calculating cell number per filed the imaging were selected randomly</a>                                                                                     |
| Blinding        | <a href="#">Investigators were not blinded. Quantification of counting cell number and positive signal cell number applied equally conditions and replicates experiment.</a> |

## Reporting for specific materials, systems and methods

We require information from authors about some types of materials, experimental systems and methods used in many studies. Here, indicate whether each material, system or method listed is relevant to your study. If you are not sure if a list item applies to your research, read the appropriate section before selecting a response.

## Materials & experimental systems

- |                                     |                                     |                               |
|-------------------------------------|-------------------------------------|-------------------------------|
| n/a                                 | <input type="checkbox"/>            | Involved in the study         |
| <input type="checkbox"/>            | <input checked="" type="checkbox"/> | Antibodies                    |
| <input type="checkbox"/>            | <input checked="" type="checkbox"/> | Eukaryotic cell lines         |
| <input checked="" type="checkbox"/> | <input type="checkbox"/>            | Palaeontology and archaeology |
| <input type="checkbox"/>            | <input checked="" type="checkbox"/> | Animals and other organisms   |
| <input checked="" type="checkbox"/> | <input type="checkbox"/>            | Clinical data                 |
| <input checked="" type="checkbox"/> | <input type="checkbox"/>            | Dual use research of concern  |

## Methods

- |                                     |                          |                        |
|-------------------------------------|--------------------------|------------------------|
| n/a                                 | <input type="checkbox"/> | Involved in the study  |
| <input checked="" type="checkbox"/> | <input type="checkbox"/> | ChIP-seq               |
| <input checked="" type="checkbox"/> | <input type="checkbox"/> | Flow cytometry         |
| <input checked="" type="checkbox"/> | <input type="checkbox"/> | MRI-based neuroimaging |

## Antibodies

### Antibodies used

1. Immunohistochemical staining:  
 human p16INK4A, predilution (805-4713, Roche); human Ki67, 1:3000 (M7240, Dako); human H3K9me3, 1:500 (ab176916, Abcam); human p21Waf1, 1:300 (2990-1, Epitomics); human IL1 $\beta$ , 1:100 (ab9722, Abcam); human SAA1, 1:75 (MAB30191, R&D System); human SLIT2, 1:80 (HPA023088, Atlas Antibodies); human type IV Collagen, 1:300 (ab6586, Abcam); human MMP9, 1:100 (GTX100458, Genetex Inc.); human CXCL12, 1:100 (MAB350, R&D System); human CCL5, 1:200 (MAB278, R&D System); mouse p16INK4A, 1:300. (ab189034, Abcam); mouse Ki67, 1:200 (ab16667, Abcam); mouse SAA1/2, 1:1000 (ab199030, Abcam); mouse SLIT2, 1:200 (PA5-31133, Invitrogen); human/mouse NHE3, 1:500 (NBP1-82574, Novus Biologicals); human/mouse SCNN1A, 1:100 (ab272878, Abcam); mouse SOX2, 1:100 (ab92494, Abcam).

2. Multiplex IHC staining:  
 p16INK4A (predilution, 805-4713, Roche)/CD3(1:150, ab135372, Abcam), p16INK4A (predilution, 805-4713, Roche)/CD19 (1:100, ab227688, Abcam), and p16INK4A (predilution, 805-4713, Roche)/CD68 (1:2,500, NBP2-48923, Novus Biologicals) was performed using BOND Polymer Refine Detection kit (DS9800, Leica Biosystems, Wetzlar, Germany) and green chromogen kit (DC9913, Leica Biosystems) in the BOND-III fully automated IHC staining system (22.2201, Leica Biosystems).

3. Immunofluorescence staining of FFPE tissue sections:  
 SAA1, 1:50 (MAB30191, R&D Systems); p21Waf1, 1:100 (ab109520, Abcam); IL1 $\beta$ , 1:100 (ab9722, Abcam); SLIT2, 1:200 (PA5-31133, Invitrogen); p16INK4A, predilution (805-4713, Roche); Vimentin, 1:400 (ab92547, Abcam); Vimentin, 1:100 (AF2105, R&D Systems); Smoothelin, 1:100 (OMA1-06020, Invitrogen); Smoothelin, 1:500 (NBP2-37931, Novus Biologicals); E-cadherin, 1:200 (610181, Becton Dickinson); E-cadherin, 1:100 (ab15148, Abcam); CDX2, 1:100, (235R-15, Cell Margue, Rocklin, CA); Laminin antibody, 1:500 (ab11575, Abcam); Alexa Fluor 488, 1:300 (ab150113, Abcam); Alexa Fluor 488, 1:300 (A-11055, Invitrogen); Alexa Fluor 488, 1:300 (A-21206, Invitrogen); Alexa Fluor 405, 1:300 (A48255, Invitrogen); Alexa Fluor 594, 1:300 (ab150080, Abcam); Alexa Fluor 594, 1:300 (ab150116, Abcam).

4. Immunofluorescence staining of cells:  
 Ki67, 1:500 (M7240, Dako); p-Erk1/2, 1:100 (9101, Cell Signaling Technology); p-NFkB, 1:100 (3033, Cell Signaling Technology); p21Waf1, 1:100 (ab109520, Abcam); p16INK4A, 1:300 (ab189034, Abcam); TRITC- phalloidin, 1:500 (P1951, Sigma); Alexa Fluor 488, 1:600 (A-21206, Thermo Fisher Scientific); Alexa Fluor 555, 1:600 (A-31572, Thermo Fisher Scientific).

5. Immunoblotting:  
 p16INK4A, 1:1000 (LS-B1347, LSBio, Seattle, WA); p21Waf1, 1:1000 (ab109520, Abcam); p53, 1:1000 (MA5-12557, Invitrogen); p-Erk1/2, 1:1000 (9101, Cell Signaling Technology); Total Erk1/2, 1:1000 (9107, Cell Signaling Technology); MDM2, 1:1000 (ab16895, Abcam); Actin, 1:3000 (Abc-2004, Abclon); p-NFkB, 1:1000 (3033, Cell Signaling Technology); Total NFkB, 1:1000 (8242, Cell Signaling Technology); Ikb $\alpha$ , 1:1000 (4814, Cell Signaling Technology); p-Pyk2, 1:1000 (3291, Cell Signaling Technology); Total Pyk2, 1:1000 (3292, Cell Signaling Technology); SOX2, 1:500 (ab92494, Abcam); OCT4, 1:1000 (ab19857, Abcam); MMP9, 1:1000 (GTX100458, Genetex Inc.); Tubulin, 1:1000 (sc-32293, Santa Cruz Biotechnology inc.); GAPDH, 1:1000 (60004-1-Ig, Proteintech); Type IV collagen, 1:1000 (ab6586, Abcam).

### Validation

All validation statements were taken from suppliers website.

## Eukaryotic cell lines

Policy information about [cell lines and Sex and Gender in Research](#)

### Cell line source(s)

Primary normal human dermal fibroblasts, pulmonary artery smooth muscle cells (PASMCS), Human pulmonary alveolar epithelial cells (HPAEPiC), human primary colonic epithelial cells (HCoEPiC), SW480 cells and IMR90 cells were used in this study. The primary cell's personal information was not provide to protect privacy.

### Authentication

Primary normal human dermal fibroblasts were isolated from foreskin. Primary pulmonary artery smooth muscle cells (PASMCS), SW480 and IMR90 cells were purchased from American Tissue Culture Collections (ATCC, Rockville, MD). Human pulmonary alveolar epithelial cells (HPAEPiC) and human primary colonic epithelial cells (HCoEPiC) were purchase from ScienCell Research Laboratories, Inc. (Carlsbad, CA) and Cell Biologics, Inc. (Chicago, IL), respectively.

### Mycoplasma contamination

All cell lines were confirmed free of mycoplasma contamination by MycoLuoR Mycoplasma Detection Kit (Invitrogen, #M7006)

### Commonly misidentified lines (See [ICLAC](#) register)

N/A

## Animals and other research organisms

Policy information about [studies involving animals](#); [ARRIVE guidelines](#) recommended for reporting animal research, and [Sex and Gender in Research](#)

|                         |                                                                                                                                                                                                                                                                                                     |
|-------------------------|-----------------------------------------------------------------------------------------------------------------------------------------------------------------------------------------------------------------------------------------------------------------------------------------------------|
| Laboratory animals      | Male and female C57BL/6J and male C57BL/6N mice                                                                                                                                                                                                                                                     |
| Wild animals            | N/A                                                                                                                                                                                                                                                                                                 |
| Reporting on sex        | Male and female C57BL/6J mice (4-month-old and 12-month-old) were purchased from KBSI (Korea Basic Science Institute, Gwangju, Korea). We are consider male and female mice in this experiment. Male C57BL/6N mouse were purchased from ORIENT BIO (Seongnam, Korea).                               |
| Field-collected samples | Blood was immediately collected by intracardial puncture and then serum was collected by centrifuging samples. Colon, small intestine, stomach, lung, liver and skin were isolated and embedded in paraffin. The skeletal muscles from the hindlimb were dissected and embedded in an OCT compound. |
| Ethics oversight        | All animal procedures were approved by the institutional animal research ethics committee at Ajou University Medical Center (approval number: 2020-0051).                                                                                                                                           |

Note that full information on the approval of the study protocol must also be provided in the manuscript.
